# Supplementary material
Source: ML conference proceedings conference paper supplement (https://proceedings.mlr.press/v48/germain16.html)
Supplement: Supplementary file 1 [file germain16-supp.pdf]

# A New PAC-Bayesian Perspective on Domain Adaptation – Supplementary Material

Pascal Germain, Amaury Habrard, François Laviolette, Emilie Morvant

## 1 Proof of Theorem 4

*Proof.* We use the following shorthand notation:

$$\mathcal{L}_{\mathcal{D}}(h) = \mathbf{E}_{(\mathbf{x}, y) \sim \mathcal{D}} \ell(h, \mathbf{x}, y) \quad \text{and} \quad \mathcal{L}_{\mathcal{S}}(h) = \frac{1}{m} \sum_{(\mathbf{x}, y) \in S} \ell(h, \mathbf{x}, y).$$

Consider any convex function  $\Delta : [0, 1] \times [0, 1] \rightarrow \mathbb{R}$ . Applying consecutively Jensen's Inequality and the *change of measure inequality* (see [Seldin & Tishby \(2010, Lemma 4\)](#) and [McAllester \(2013, Equation \(20\)\)](#)), we obtain

$$\begin{aligned} \forall \rho \text{ on } \mathcal{H} : \quad m \times \Delta \left( \mathbf{E}_{h \sim \rho} \mathcal{L}_{\mathcal{S}}(h), \mathbf{E}_{h \sim \rho} \mathcal{L}_{\mathcal{D}}(h) \right) &\leq \mathbf{E}_{h \sim \rho} m \times \Delta (\mathcal{L}_{\mathcal{S}}(h), \mathcal{L}_{\mathcal{D}}(h)) \\ &\leq \text{KL}(\rho \| \pi) + \ln [X_{\pi}(S)], \end{aligned}$$

with

$$X_{\pi}(S) = \mathbf{E}_{h \sim \pi} e^{m \times \Delta (\mathcal{L}_{\mathcal{S}}(h), \mathcal{L}_{\mathcal{D}}(h))}.$$

Then, Markov's Inequality gives

$$\Pr_{S \sim \mathcal{D}^m} \left( X_{\pi}(S) \leq \frac{1}{\delta} \mathbf{E}_{S' \sim \mathcal{D}^m} X_{\pi}(S') \right) \geq 1 - \delta,$$

and

$$\begin{aligned} \mathbf{E}_{S' \sim \mathcal{D}^m} X_{\pi}(S') &= \mathbf{E}_{S' \sim \mathcal{D}^m} \mathbf{E}_{h \sim \pi} e^{m \times \Delta (\mathcal{L}_{S'}(h), \mathcal{L}_{\mathcal{D}}(h))} \\ &= \mathbf{E}_{h \sim \pi} \mathbf{E}_{S' \sim \mathcal{D}^m} e^{m \times \Delta (\mathcal{L}_{S'}(h), \mathcal{L}_{\mathcal{D}}(h))} \\ &\leq \mathbf{E}_{h \sim \pi} \sum_{k=0}^m \binom{m}{k} (\mathcal{L}_{\mathcal{D}}(h))^k (1 - \mathcal{L}_{\mathcal{D}}(h))^{m-k} e^{m \times \Delta (\frac{k}{m}, \mathcal{L}_{\mathcal{D}}(h))}, \end{aligned} \tag{1}$$

where the last inequality is due to [Maurer \(2004, Lemma 3\)](#) (we have an equality when the output of  $\ell$  is in  $\{0, 1\}$ ). As shown in [Germain et al. \(2009, Corollary 2.2\)](#), by fixing

$$\Delta(q, p) = -c \times q - \ln[1 - p(1 - e^{-c})],$$

Line 1 becomes equal to 1, and then  $\mathbf{E}_{S' \sim \mathcal{D}^m} X_{\pi}(S') \leq 1$ . Hence,

$$\Pr_{S \sim \mathcal{D}^m} \left( \forall \rho \text{ on } \mathcal{H} : -c \mathbf{E}_{h \sim \rho} \mathcal{L}_{\mathcal{S}}(h) - \ln[1 - \mathbf{E}_{h \sim \rho} \mathcal{L}_{\mathcal{D}}(h) (1 - e^{-c})] \leq \frac{\text{KL}(\rho \| \pi) + \ln \frac{1}{\delta}}{m} \right) \geq 1 - \delta.$$

By reorganizing the terms, we have, with probability  $1 - \delta$  over the choice of  $S \in \mathcal{D}^m$ ,

$$\forall \rho \text{ on } \mathcal{H} : \mathbf{E}_{h \sim \rho} \mathcal{L}_{\mathcal{D}}(h) \leq \frac{1}{1 - e^{-c}} \left[ 1 - \exp \left( -c \mathbf{E}_{h \sim \rho} \mathcal{L}_{\mathcal{S}}(h) - \frac{\text{KL}(\rho \| \pi) + \ln \frac{1}{\delta}}{m} \right) \right].$$

The final result is obtained by using the inequality  $1 - \exp(-z) \leq z$ . □

## 2 Using DALC with a kernel function

Let  $S = \{(\mathbf{x}_i, y_i)\}_{i=1}^{m_s}$ ,  $T = \{\mathbf{x}'_i\}_{i=1}^{m_t}$  and  $M = m_s + m_t$ . We will denote

$$\mathbf{x}_\# = \begin{cases} \mathbf{x}_i & \text{if } \# \leq m_s \quad (\text{source examples}) \\ \mathbf{x}'_{\#-m_s} & \text{otherwise.} \quad (\text{target examples}) \end{cases}$$

The kernel trick allows us to work with dual weight vector  $\boldsymbol{\alpha} \in \mathbb{R}^M$  that is a linear classifier in an augmented space. Given a kernel  $k : \mathbb{R}^d \times \mathbb{R}^d \rightarrow \mathbb{R}$ , we have

$$h_{\mathbf{w}}(\cdot) = \text{sign} \left[ \sum_{i=1}^M \alpha_i k(\mathbf{x}_i, \cdot) \right].$$

Let us denote  $K$  the kernel matrix of size  $M \times M$  such as  $K_{i,j} = k(\mathbf{x}_i, \mathbf{x}_j)$ . In that case, the objective function—Equation (13) of the main paper—can be rewritten in term of the vector

$$\boldsymbol{\alpha} = (\alpha_1, \alpha_2, \dots, \alpha_M)$$

as

$$C \times \sum_{i=1}^M \Phi \left( \frac{\sum_{j=1}^M \alpha_j K_{i,j}}{\sqrt{K_{i,i}}} \right) \Phi \left( -\frac{\sum_{j=1}^M \alpha_j K_{i,j}}{\sqrt{K_{i,i}}} \right) + B \times \sum_{i=1}^{m_s} \left[ \Phi \left( y_i \frac{\sum_{j=1}^M \alpha_j K_{i,j}}{\sqrt{K_{i,i}}} \right) \right]^2 + \sum_{i=1}^M \sum_{j=1}^M \alpha_i \alpha_j K_{i,j}.$$

For our experiments, we minimize this objective function using a *Broyden-Fletcher-Goldfarb-Shanno method (BFGS)* implemented in the *scipy* python library Jones et al. (2001–).

We initialize the optimization procedure at  $\alpha_i = \frac{1}{M}$  for all  $i \in \{1, \dots, M\}$ .

## 3 Experimental Protocol

For obtaining the DALC<sup>RCV</sup> results of Table 1, the reverse validation procedure searches on a  $20 \times 20$  parameter grid for a  $C$  between 0.01 and  $10^6$  and a parameter  $B$  between 1.0 and  $10^8$ , both on a logarithm scale. The results of the other algorithms are reported from Germain et al. (2013).

## References

- Germain, P., Lacasse, A., Laviolette, F., and Marchand, M. PAC-Bayesian learning of linear classifiers. In *ICML*, pp. 353–360, 2009.
- Germain, P., Habrard, A., Laviolette, F., and Morvant, E. A PAC-Bayesian approach for domain adaptation with specialization to linear classifiers. In *ICML*, pp. 738–746, 2013.
- Jones, E., Oliphant, T., Peterson, P., et al. SciPy: Open source scientific tools for Python, 2001–. URL <http://www.scipy.org/>.
- Maurer, A. A note on the PAC-Bayesian theorem. *CoRR*, cs.LG/0411099, 2004.
- McAllester, D. A PAC-Bayesian tutorial with a dropout bound. *CoRR*, abs/1307.2118, 2013.
- Seldin, Y. and Tishby, N. PAC-Bayesian analysis of co-clustering and beyond. *JMLR*, 11:3595–3646, 2010.
